# Supplementary material for: Teaching and learning during the first COVID-19 school lockdown: Realization and associations with parent-perceived students' academic outcomes
Source: Atypon-hosted journal article supplement (doi:10.1024/1010-0652/a000306), 2021-03-04
Supplement: 1010-0652_a000306_esm1.pdf [file 1010-0652_a000306_esm1.pdf]

## Electronic Supplementary Material

### Teaching and Learning During the first COVID-19 School Lockdown: Realization and Associations with Parent-Perceived Students' Academic Outcomes—A study and preliminary overview

By Steinmayr, Lazarides, Weidinger & Christiansen, 2021,

*Zeitschrift für Pädagogische Psychologie*

#### Overview

**Supplement 1.** Further information on the sample

**Supplement 2.** Description how the distant teaching activities were modelled

**Supplement 3.** Frequencies and percentages of all distant teaching activities by elementary school teachers

**Supplement 4.** Frequencies and percentages of all distant teaching activities by secondary school teachers

**Supplement 5.** Figures depicting the frequencies of all distant teaching activities by elementary and secondary school teachers

**Supplement 6.** Descriptive statistics for the elementary school sample

**Supplement 7.** Descriptive statistics for the secondary school sample

**Supplement 8.** Model fit of structure equation models without student characteristics and demographics as additional predictors

**Supplement 9.** Results of structure equation models without student characteristics and demographics as additional predictors

### **Supplement 1. Further information on the sample**

The majority of the study's participants (44.8 %) was from North-Rhine-Westphalia, 18.5 % of parents were from Lower Saxony, 11.9 % from Baden-Wuerttemberg, 4.6 % from Bavaria, 3.9 % from Hesse, 3.1 % from Rhineland-Palatinate, 2.6 % from Schleswig-Holstein, 2.6 % from Thuringia, 2.0 % from Berlin, 1.7 % from Saxony, 0.9 % from Mecklenburg-Western Pomerania, 0.6 % from Brandenburg, 0.6 % from Saxony-Anhalt, 0.5 % from Hamburg, and 0.5 % from Saarland.

Parents indicated that their children attended the following schools: 40.2 % of all children attended elementary schools, 37.5 % academic track secondary schools ("Gymnasium"), 8.8 % comprehensive secondary schools ("Gesamtschule"), 7.9 % intermediate track secondary schools ("Realschule"), 0.8 % lowest track secondary schools ("Hauptschule"), 0.6 % schools for special educational needs ("Förderschule"), and 4.1 % another school type.

Parents indicated that their children attended the following grades: Grade 1: 9.2 %; Grade 2: 10.0 %; Grade 3: 11.6 %; Grade 4: 9.6 %; Grade 5: 16.4 %; Grade 6: 12.6 %; Grade 7: 11.0 %; Grade 8: 6.8 %; Grade 9: 6.6 %; Grade 10: 2.6 %; Grade 11: 1.7 %; Grade 12: 0.6 %; Grade 13: 0.2 %.

## **Supplement 2. Description how the distant teaching activities were modelled**

The measurement model for distant teaching activities were set up the following way: items with the same word stem rated for teachers in different subjects (math, language arts, English, science/biology) were regressed on a factor indicating how often this distant teaching activity over different subjects was realized in the class that the student attended. In all federal states, it was up to the schools to decide how to realize distant teaching. Thus, all activities were correlated as it might be assumed that at one school the principal and/or the teachers agreed on which distant teaching activities had to be realized. Furthermore, four additional latent factors indicating the four subject teachers were modeled. All distant teaching activities that one teacher realized were regressed on the corresponding teacher factor. Beside the schools' decision on how to realize distant teaching it might well be that some teachers were more engaged in the realization of distant teaching than others. This potential additional variance was captured by these teacher factors. We explicitly asked parents to rate each subject, even if one teacher taught more than one subject, which is especially likely in elementary school but also happens in secondary school. Thus, we correlated the teacher factors in order to control for this (s. Figure 1 in the manuscript). We also tested a hierarchical model with a general distant teaching activities factor indicated by all single distant teaching activities. The model fit did not differ from the measurement model depicted in Figure 1. As we were primarily interested in how each distant teaching activity and not a general distant teaching activity factor was associated with students' motivation, competent and independent learning, and learning progress during the school lockdown, we decided to model distant teaching activities as described above.

**Supplement 3. Frequencies and percentages of all distant teaching activities by elementary school teachers**

**Table S3**

*Frequencies and percentages of all distant teaching activities by elementary school teachers*

| How often did the following teacher...    | Not yet |       | 1 every 3 weeks |       | 1 every 2 weeks |       | Every week |       | 2 per week |       | 3 per week (or more) |       |
|-------------------------------------------|---------|-------|-----------------|-------|-----------------|-------|------------|-------|------------|-------|----------------------|-------|
|                                           | Fre.    | Perc. | Fre.            | Perc. | Fre.            | Perc. | Fre.       | Perc. | Fre.       | Perc. | Fre.                 | Perc. |
| ... send tasks?                           |         |       |                 |       |                 |       |            |       |            |       |                      |       |
| Math teacher                              | 22      | 2.1   | 94              | 8.8   | 199             | 18.7  | 678        | 63.8  | 26         | 2.4   | 44                   | 4.1   |
| Language arts teacher                     | 25      | 2.4   | 95              | 8.9   | 191             | 18.0  | 683        | 64.3  | 27         | 2.5   | 42                   | 4.0   |
| English teacher                           | 563     | 53.0  | 120             | 11.3  | 93              | 8.7   | 271        | 25.5  | 6          | 0.6   | 10                   | 0.9   |
| Biology/Science teacher                   | 434     | 40.8  | 118             | 11.1  | 127             | 11.9  | 364        | 34.2  | 10         | 0.9   | 10                   | 0.9   |
| ... send solutions?                       |         |       |                 |       |                 |       |            |       |            |       |                      |       |
| Math teacher                              | 550     | 52.2  | 47              | 4.5   | 77              | 7.3   | 316        | 30.0  | 16         | 1.5   | 48                   | 4.6   |
| Language arts teacher                     | 564     | 53.5  | 49              | 4.6   | 77              | 7.3   | 313        | 29.7  | 13         | 1.2   | 38                   | 3.6   |
| English teacher                           | 824     | 78.2  | 30              | 2.8   | 39              | 3.7   | 147        | 13.9  | 2          | 0.2   | 12                   | 1.1   |
| Biology/Science teacher                   | 761     | 72.2  | 37              | 3.5   | 51              | 4.8   | 180        | 17.1  | 7          | 0.7   | 18                   | 1.7   |
| ... requested students' solutions?        |         |       |                 |       |                 |       |            |       |            |       |                      |       |
| Math teacher                              | 497     | 47.5  | 90              | 8.6   | 98              | 9.4   | 305        | 29.2  | 20         | 1.9   | 36                   | 3.4   |
| Language arts teacher                     | 450     | 43.0  | 105             | 10.0  | 106             | 10.1  | 331        | 31.6  | 21         | 2.0   | 33                   | 3.2   |
| English teacher                           | 792     | 75.7  | 42              | 4.0   | 44              | 4.2   | 150        | 14.3  | 9          | 0.9   | 9                    | 0.9   |
| Biology/Science teacher                   | 701     | 67.0  | 60              | 5.7   | 78              | 7.5   | 187        | 17.9  | 10         | 1.0   | 10                   | 1.0   |
| ... gave feedback on students' solutions? |         |       |                 |       |                 |       |            |       |            |       |                      |       |
| Math teacher                              | 613     | 59.4  | 101             | 9.8   | 80              | 7.8   | 196        | 19.0  | 18         | 1.7   | 24                   | 2.3   |
| Language arts teacher                     | 565     | 54.7  | 120             | 11.6  | 89              | 8.6   | 211        | 20.4  | 20         | 1.9   | 27                   | 2.6   |
| English teacher                           | 859     | 83.2  | 38              | 3.7   | 39              | 3.8   | 79         | 7.7   | 9          | 0.9   | 8                    | 0.8   |
| Biology/Science teacher                   | 784     | 76.0  | 63              | 6.1   | 61              | 5.9   | 101        | 9.8   | 12         | 1.2   | 11                   | 1.1   |
| ... graded students' solutions?           |         |       |                 |       |                 |       |            |       |            |       |                      |       |
| Math teacher                              | 957     | 93.4  | 19              | 1.9   | 17              | 1.7   | 28         | 2.7   | 4          | 0.4   |                      |       |
| Language arts teacher                     | 947     | 92.4  | 27              | 2.6   | 19              | 1.9   | 29         | 2.8   | 3          | 0.3   |                      |       |
| English teacher                           | 987     | 96.3  | 12              | 1.2   | 6               | 0.6   | 19         | 1.9   | 1          | 0.1   |                      |       |
| Biology/Science teacher                   | 983     | 95.9  | 14              | 1.4   | 9               | 0.9   | 17         | 1.7   | 2          | 0.2   |                      |       |
| ... taught via videoconference?           |         |       |                 |       |                 |       |            |       |            |       |                      |       |
| Math teacher                              | 912     | 89.2  | 32              | 3.1   | 11              | 1.1   | 50         | 4.9   | 7          | 0.7   | 10                   | 1.0   |
| Language arts teacher                     | 886     | 86.7  | 53              | 5.2   | 11              | 1.1   | 51         | 5.0   | 10         | 1.0   | 11                   | 1.1   |
| English teacher                           | 977     | 95.6  | 10              | 1.0   | 8               | 0.8   | 16         | 1.6   | 5          | 0.5   | 6                    | 0.6   |
| Biology/Science teacher                   | 979     | 95.8  | 10              | 1.0   | 7               | 0.7   | 16         | 1.6   | 4          | 0.4   | 6                    | 0.6   |
| ... had contact with their child?         |         |       |                 |       |                 |       |            |       |            |       |                      |       |
| Math teacher                              | 646     | 63.5  | 155             | 15.2  | 54              | 5.3   | 119        | 11.7  | 22         | 2.2   | 22                   | 2.2   |
| Language arts teacher                     | 570     | 56.0  | 207             | 20.3  | 70              | 6.9   | 122        | 12.0  | 26         | 2.6   | 23                   | 2.3   |
| English teacher                           | 877     | 86.1  | 47              | 4.6   | 24              | 2.4   | 53         | 5.2   | 9          | 0.9   | 8                    | 0.8   |
| Biology/Science teacher                   | 810     | 79.6  | 80              | 7.9   | 28              | 2.8   | 77         | 7.6   | 12         | 1.2   | 11                   | 1.1   |
| ... had contact with a parent?            |         |       |                 |       |                 |       |            |       |            |       |                      |       |
| Math teacher                              | 497     | 49.1  | 204             | 20.1  | 83              | 8.2   | 184        | 18.2  | 25         | 2.5   | 20                   | 2.0   |
| Language arts teacher                     | 439     | 43.3  | 225             | 22.2  | 92              | 9.1   | 205        | 20.2  | 30         | 3.0   | 22                   | 2.2   |
| English teacher                           | 823     | 81.2  | 67              | 6.6   | 36              | 3.6   | 68         | 6.7   | 13         | 1.3   | 6                    | 0.6   |
| Biology/Science teacher                   | 742     | 73.2  | 84              | 8.3   | 50              | 4.9   | 107        | 10.6  | 15         | 1.5   | 15                   | 1.5   |

*Notes.*  $N = 1,063$ . Fre. = Frequency. Perc. = valid Percent.

**Supplement 4. Frequencies and percentages of all distant teaching activities by secondary school teachers**

**Table S4**

*Frequencies and percentages of all distant teaching activities by teachers at a Gymnasium (academic track), Realschule (intermediate track), Hauptschule (lowest track), and Gesamtschule (comprehensive school)*

| How often did the following teacher...    | Not yet |       | 1 every 3 weeks |       | 1 every 2 weeks |       | Every week |       | 2 per week |       | 3 per week (or more) |       |
|-------------------------------------------|---------|-------|-----------------|-------|-----------------|-------|------------|-------|------------|-------|----------------------|-------|
|                                           | Fre.    | Perc. | Fre.            | Perc. | Fre.            | Perc. | Fre.       | Perc. | Fre.       | Perc. | Fre.                 | Perc. |
| ... send tasks?                           |         |       |                 |       |                 |       |            |       |            |       |                      |       |
| Math teacher                              | 21      | 1.4   | 78              | 5.4   | 125             | 8.6   | 987        | 67.8  | 151        | 10.4  | 94                   | 6.5   |
| Language arts teacher                     | 25      | 1.7   | 84              | 5.8   | 167             | 11.5  | 958        | 65.8  | 144        | 9.9   | 78                   | 5.4   |
| English teacher                           | 27      | 1.9   | 69              | 4.7   | 154             | 10.6  | 976        | 67.0  | 152        | 10.4  | 78                   | 5.4   |
| Biology/Science teacher                   | 193     | 13.3  | 152             | 10.4  | 259             | 17.8  | 775        | 53.2  | 52         | 3.6   | 25                   | 1.7   |
| ... send solutions?                       |         |       |                 |       |                 |       |            |       |            |       |                      |       |
| Math teacher                              | 254     | 17.6  | 79              | 5.5   | 141             | 9.8   | 818        | 56.7  | 89         | 6.2   | 62                   | 4.3   |
| Language arts teacher                     | 493     | 34.2  | 54              | 3.7   | 144             | 10.0  | 629        | 43.6  | 73         | 5.1   | 50                   | 3.5   |
| English teacher                           | 402     | 27.9  | 53              | 3.7   | 141             | 9.8   | 718        | 49.8  | 74         | 5.1   | 55                   | 3.8   |
| Biology/Science teacher                   | 620     | 43.0  | 85              | 5.9   | 166             | 11.5  | 520        | 36.0  | 34         | 2.4   | 18                   | 1.2   |
| ... requested students' solutions?        |         |       |                 |       |                 |       |            |       |            |       |                      |       |
| Math teacher                              | 341     | 23.9  | 70              | 4.9   | 94              | 6.6   | 766        | 53.7  | 101        | 7.1   | 55                   | 3.9   |
| Language arts teacher                     | 327     | 22.9  | 103             | 7.2   | 137             | 9.6   | 731        | 51.2  | 81         | 5.7   | 48                   | 3.4   |
| English teacher                           | 322     | 22.6  | 94              | 6.6   | 132             | 9.3   | 747        | 52.3  | 85         | 6.0   | 47                   | 3.3   |
| Biology/Science teacher                   | 529     | 37.1  | 99              | 6.9   | 175             | 12.3  | 569        | 39.9  | 36         | 2.5   | 19                   | 1.3   |
| ... gave feedback on students' solutions? |         |       |                 |       |                 |       |            |       |            |       |                      |       |
| Math teacher                              | 671     | 47.4  | 116             | 8.2   | 121             | 8.6   | 420        | 29.7  | 55         | 3.9   | 32                   | 2.3   |
| Language arts teacher                     | 648     | 45.8  | 137             | 9.7   | 152             | 10.7  | 397        | 28.1  | 52         | 3.7   | 29                   | 2.0   |
| English teacher                           | 636     | 44.9  | 123             | 8.7   | 172             | 12.2  | 393        | 27.8  | 59         | 4.2   | 32                   | 2.3   |
| Biology/Science teacher                   | 870     | 61.5  | 100             | 7.1   | 119             | 8.4   | 287        | 20.3  | 24         | 1.7   | 14                   | 1.0   |
| ... graded students' solutions?           |         |       |                 |       |                 |       |            |       |            |       |                      |       |
| Math teacher                              | 1,297   | 92.2  | 30              | 2.1   | 22              | 1.6   | 46         | 3.3   | 5          | 0.4   | 6                    | 0.4   |
| Language arts teacher                     | 1,287   | 91.5  | 31              | 2.2   | 29              | 2.1   | 50         | 3.6   | 4          | 0.3   | 5                    | 0.4   |
| English teacher                           | 1,286   | 91.5  | 32              | 2.3   | 28              | 2.0   | 49         | 3.5   | 5          | 0.4   | 6                    | 0.4   |
| Biology/Science teacher                   | 1,316   | 93.6  | 28              | 2.0   | 25              | 1.8   | 33         | 2.3   | 1          | 0.1   | 3                    | 0.2   |
| ... taught via videoconference?           |         |       |                 |       |                 |       |            |       |            |       |                      |       |
| Math teacher                              | 982     | 70.1  | 84              | 6.0   | 60              | 4.3   | 211        | 15.1  | 39         | 2.8   | 24                   | 1.7   |
| Language arts teacher                     | 1,045   | 74.6  | 72              | 5.1   | 57              | 4.1   | 169        | 12.1  | 36         | 2.6   | 21                   | 1.5   |
| English teacher                           | 1,028   | 73.4  | 81              | 5.8   | 66              | 4.7   | 177        | 12.6  | 31         | 2.2   | 17                   | 1.2   |
| Biology/Science teacher                   | 1,223   | 87.4  | 35              | 2.5   | 27              | 1.9   | 87         | 6.2   | 16         | 1.1   | 12                   | 0.9   |
| ... had contact with their child?         |         |       |                 |       |                 |       |            |       |            |       |                      |       |
| Math teacher                              | 737     | 52.9  | 140             | 10.0  | 81              | 5.8   | 287        | 20.6  | 80         | 5.7   | 69                   | 4.9   |
| Language arts teacher                     | 736     | 52.8  | 142             | 10.2  | 100             | 7.2   | 292        | 20.9  | 67         | 4.8   | 57                   | 4.1   |
| English teacher                           | 726     | 52.1  | 138             | 9.9   | 100             | 7.2   | 311        | 22.3  | 62         | 4.4   | 57                   | 4.1   |
| Biology/Science teacher                   | 1,020   | 73.2  | 74              | 5.3   | 62              | 4.4   | 187        | 13.4  | 27         | 1.9   | 24                   | 1.7   |
| ... had contact with a parent?            |         |       |                 |       |                 |       |            |       |            |       |                      |       |
| Math teacher                              | 1,092   | 78.6  | 130             | 9.4   | 54              | 3.9   | 90         | 6.5   | 11         | 0.8   | 13                   | 0.9   |
| Language arts teacher                     | 1,072   | 77.1  | 159             | 11.4  | 59              | 4.2   | 77         | 5.5   | 10         | 0.7   | 13                   | 0.9   |
| English teacher                           | 1,106   | 79.6  | 122             | 8.8   | 51              | 3.7   | 84         | 6.0   | 16         | 1.2   | 11                   | 0.8   |
| Biology/Science teacher                   | 1,260   | 90.6  | 50              | 3.6   | 28              | 2.0   | 40         | 2.9   | 4          | 0.3   | 8                    | 0.6   |

Notes.  $N = 1,456$ . Fre. = Frequency. Perc. = valid Percent.

**Supplement 5. Figures depicting the frequencies of all distant teaching activities by elementary and secondary school teachers**

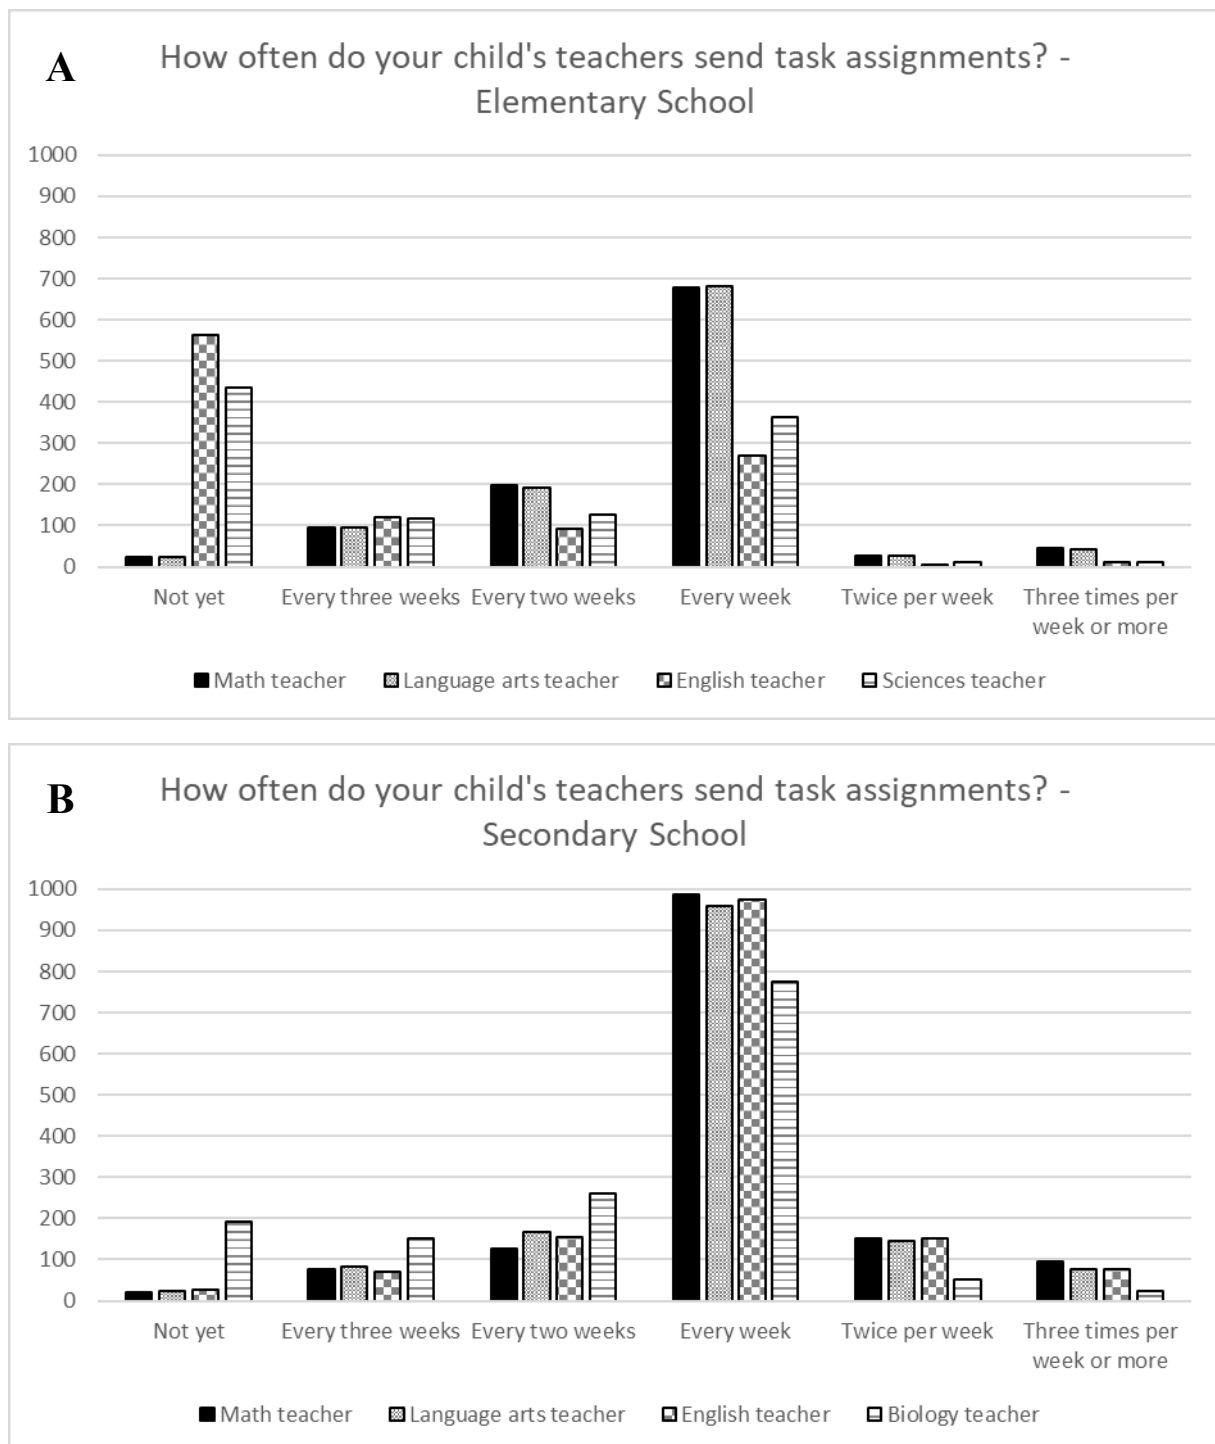

**Figure S5.1.** Frequencies of sending task assignments in elementary school (A) and secondary school (B).

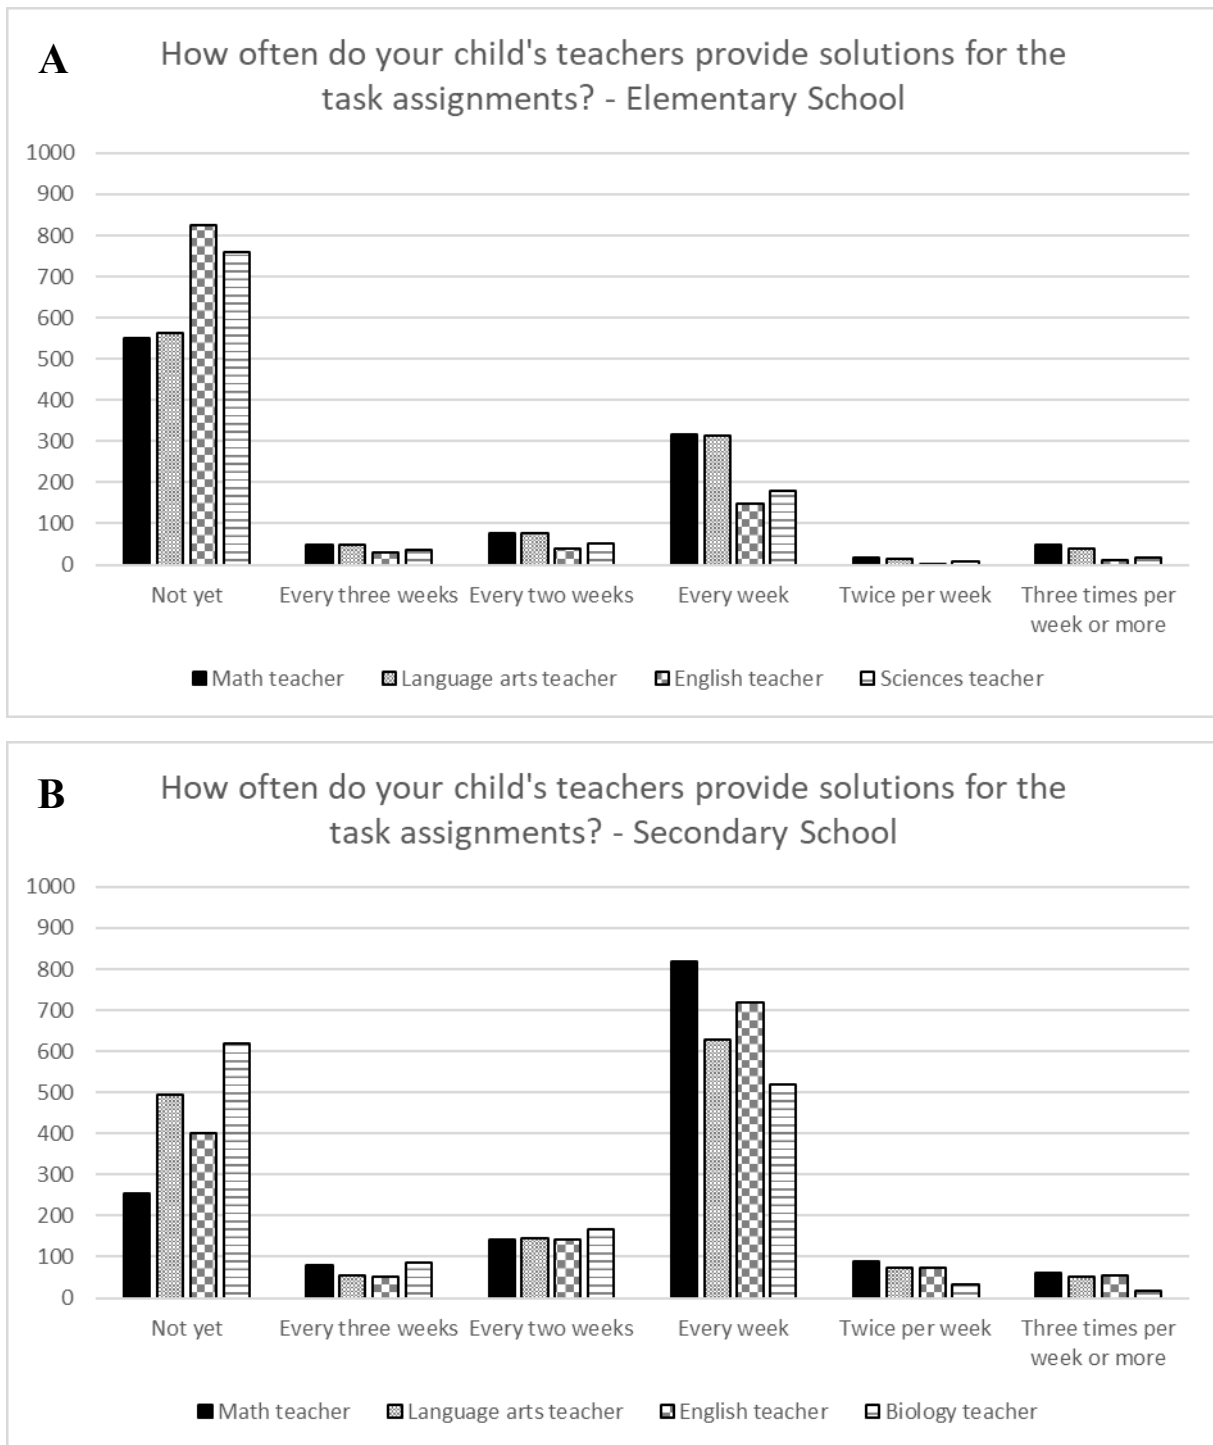

**Figure S5.2.** Frequencies of providing solutions for the task assignments in elementary school (A) and secondary school (B).

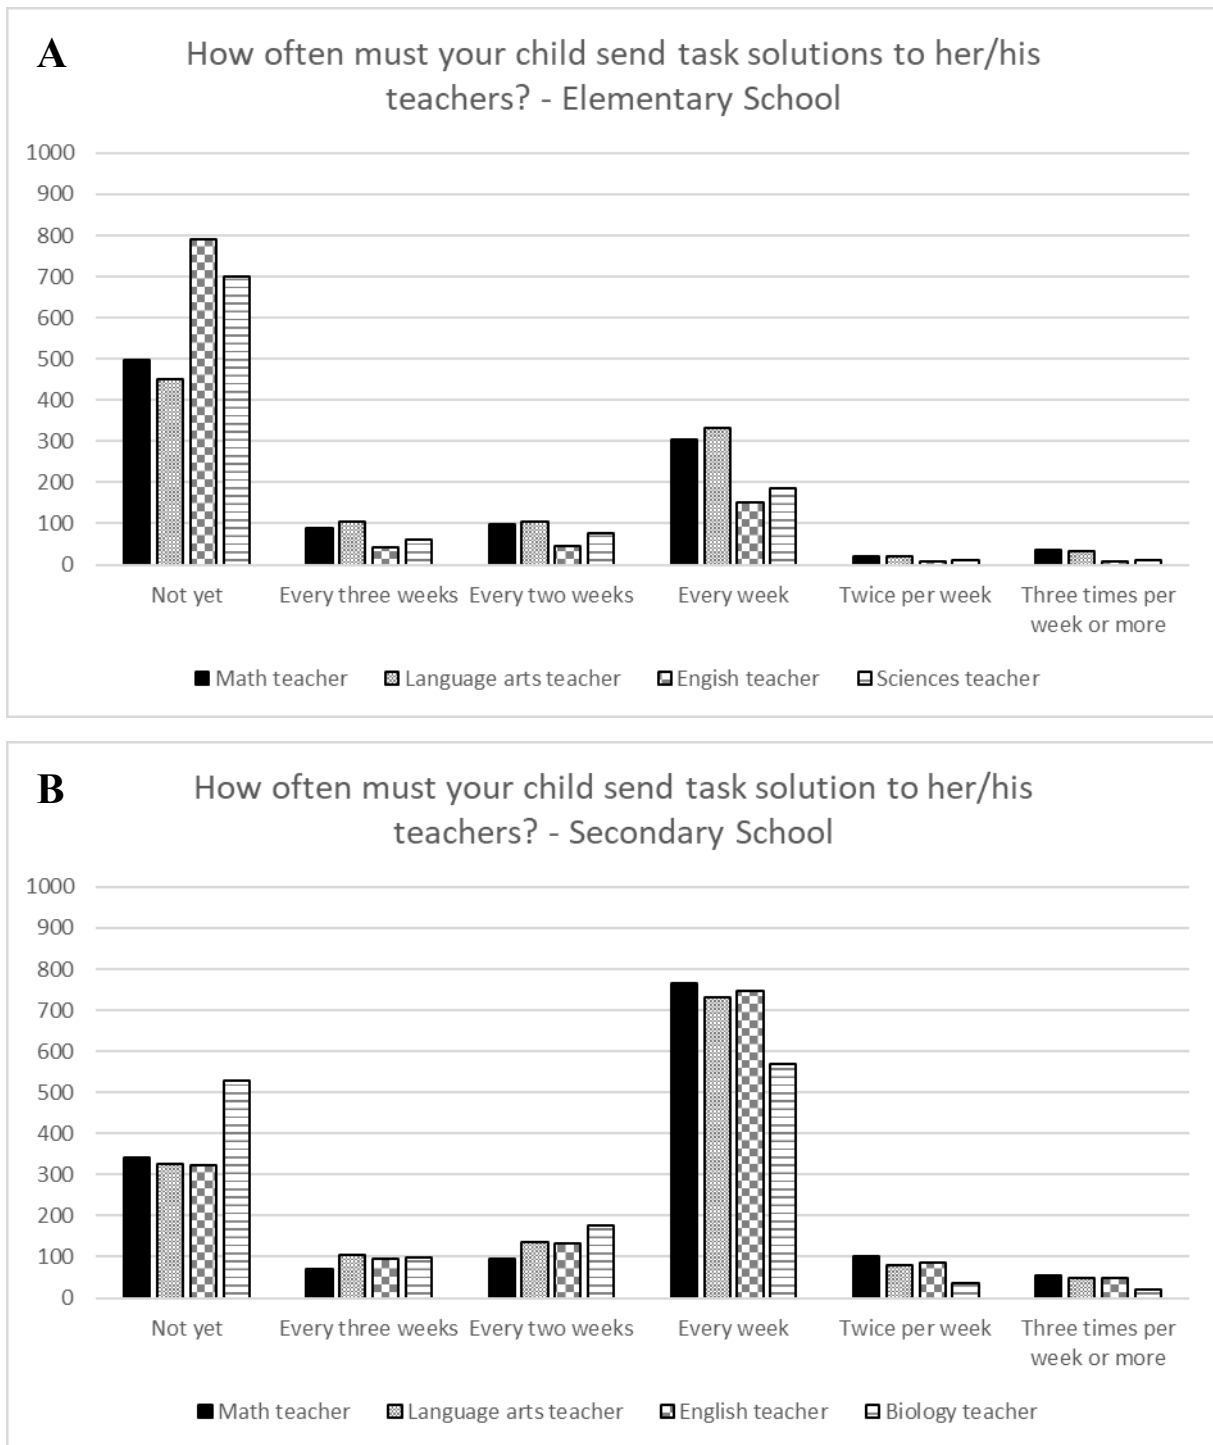

**Figure S5.3.** Frequencies of requesting solutions for the task assignments from the students in elementary school (A) and secondary school (B).



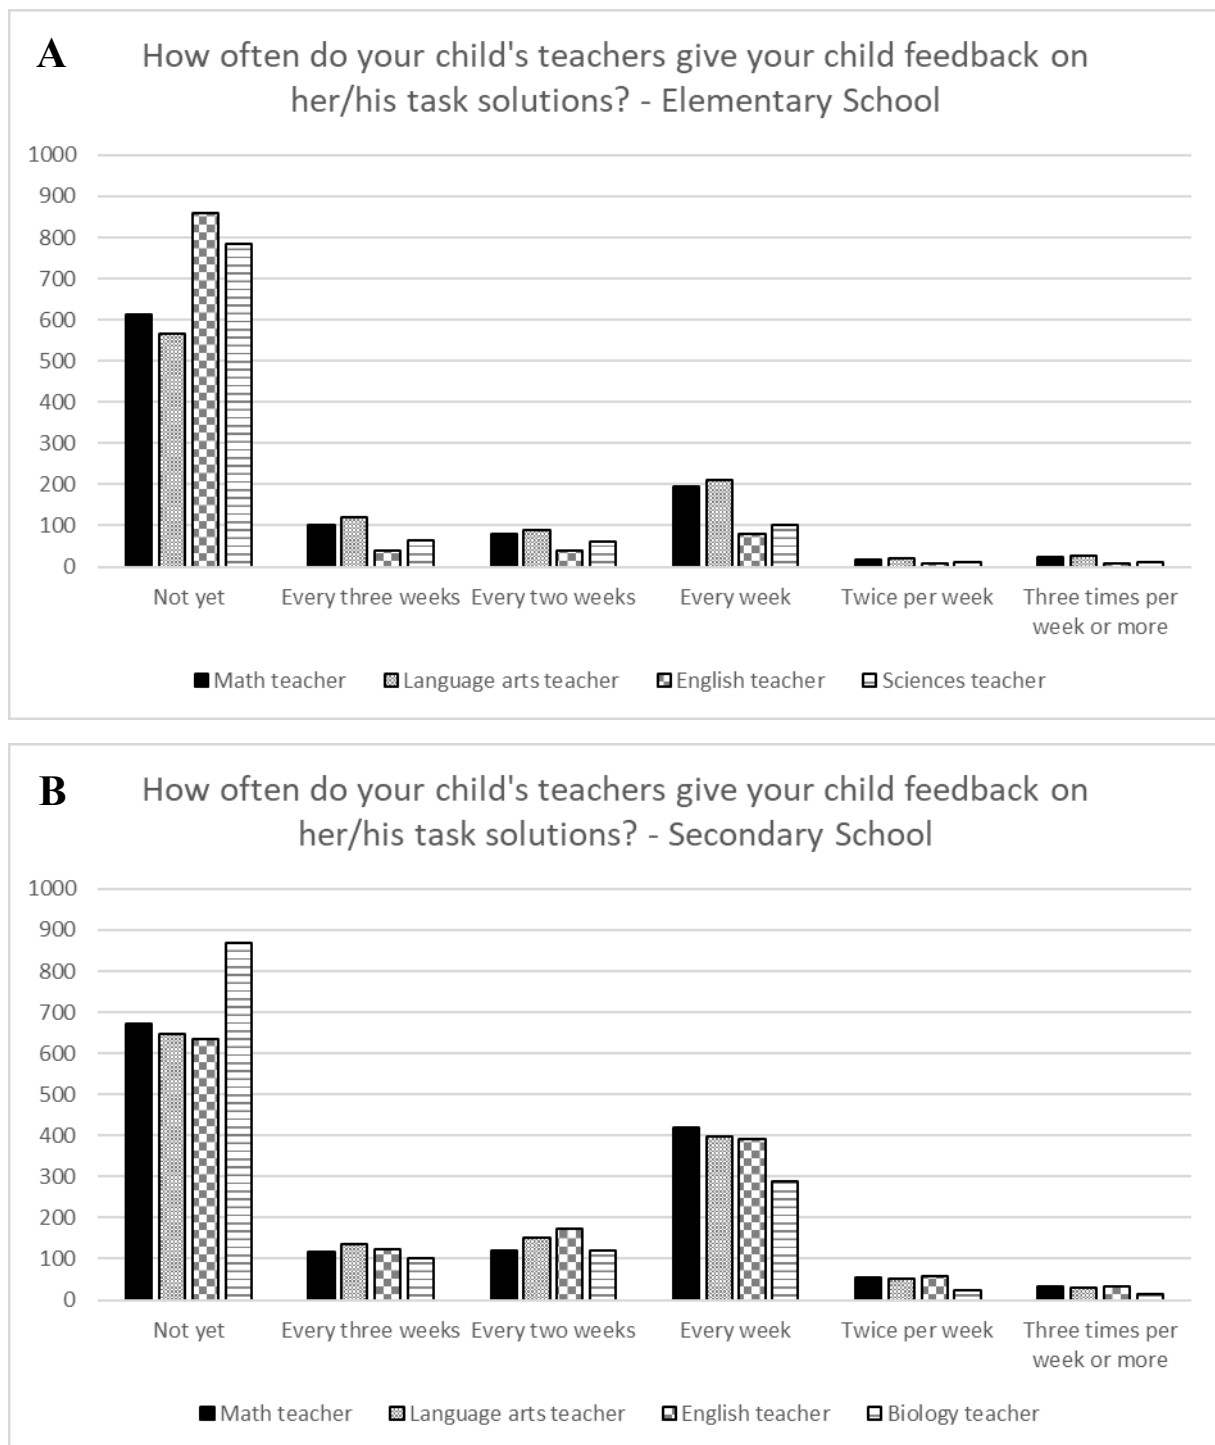

**Figure S5.4.** Frequencies of giving feedback on the students' task solutions in elementary school (A) and secondary school (B).

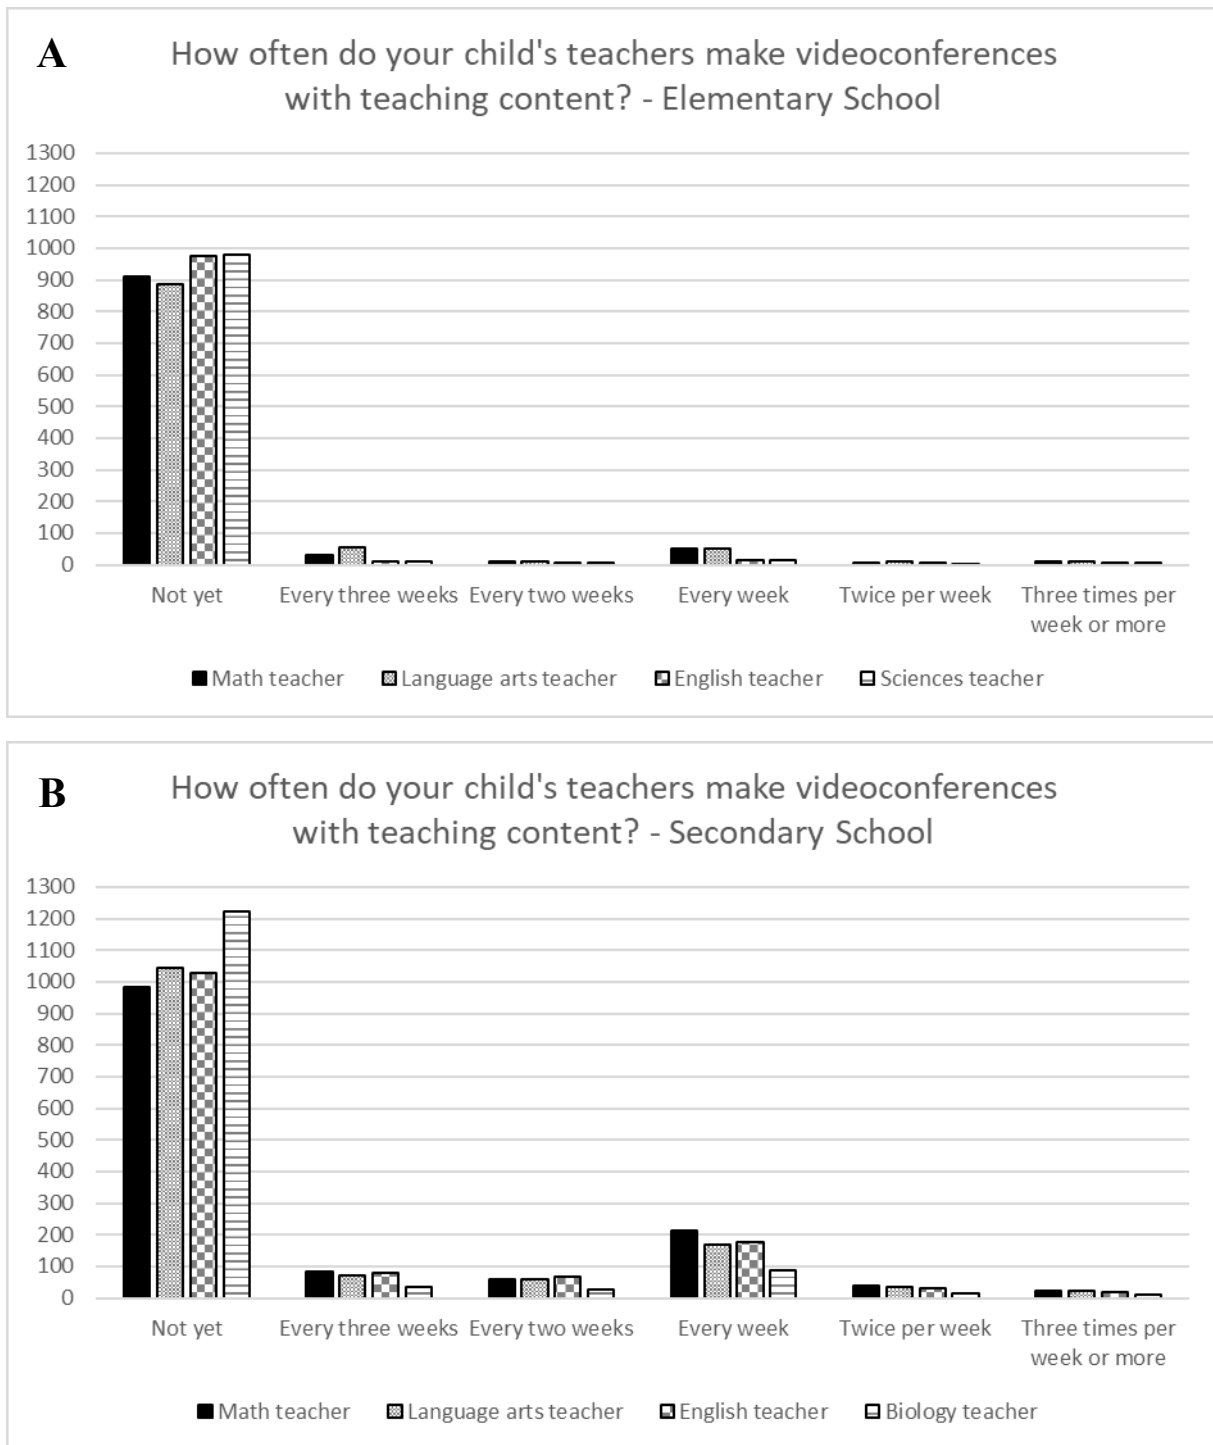

**Figure S5.5.** Frequencies of making videoconferences with teaching content in elementary school (A) and secondary school (B).

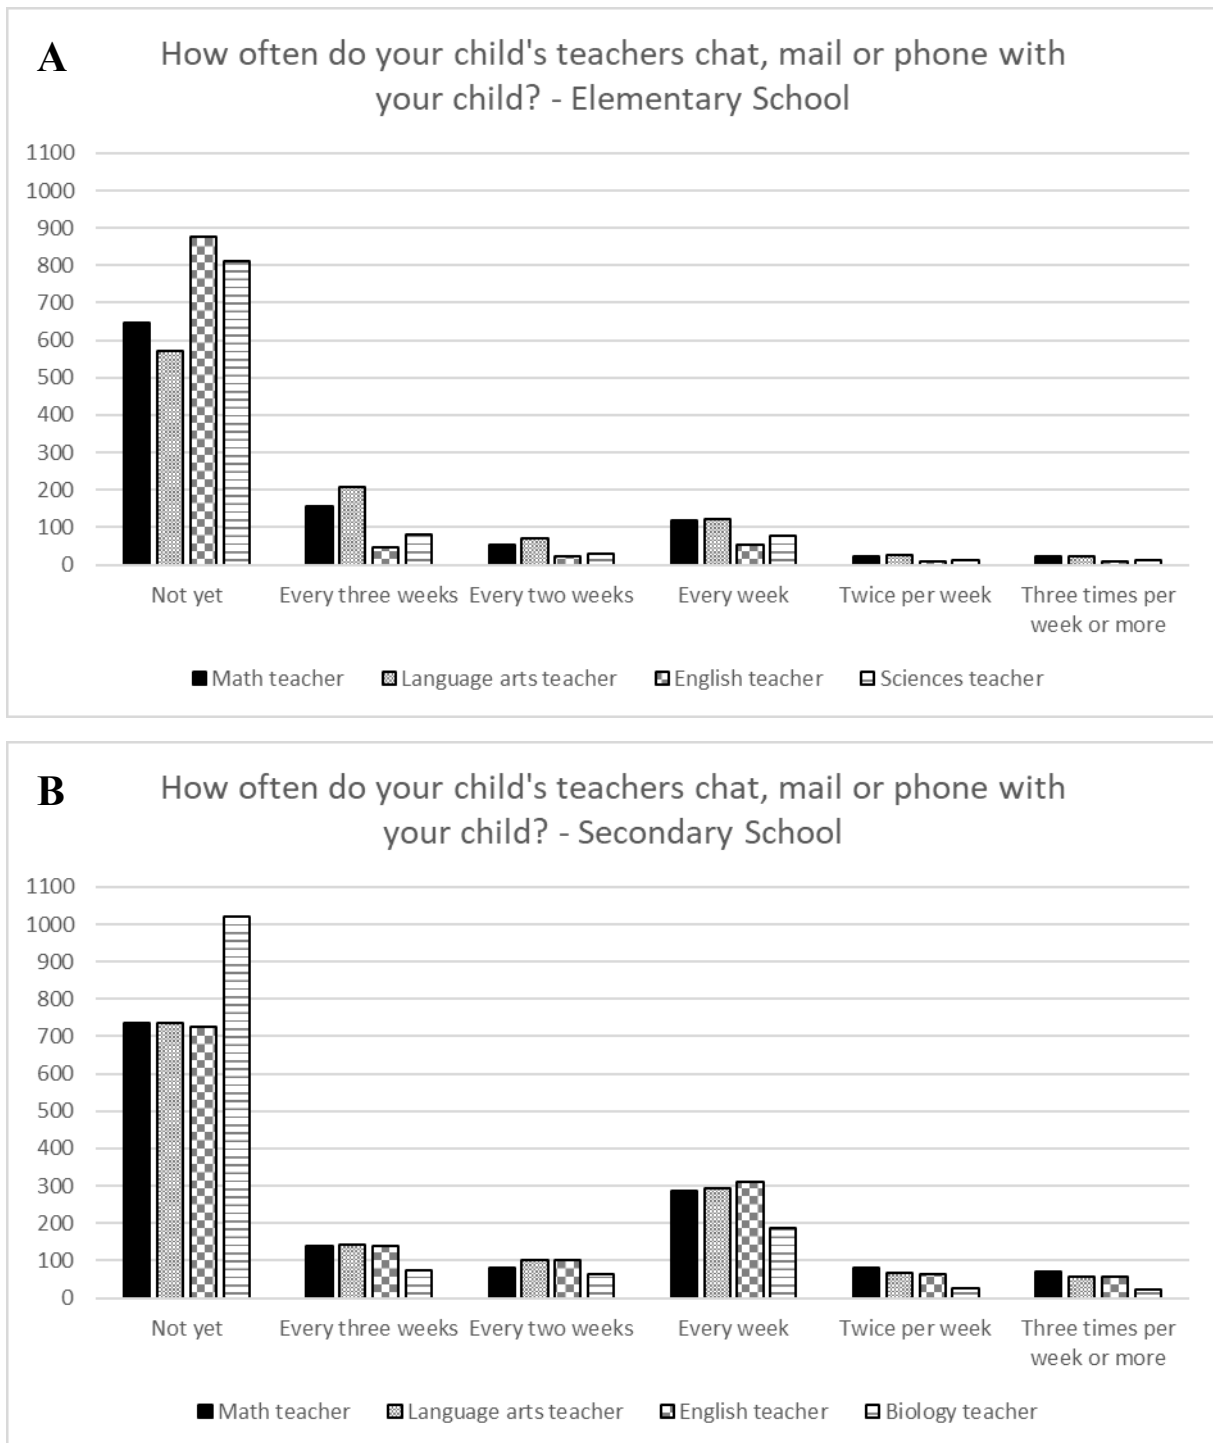

**Figure S5.6.** Frequencies of chatting, mailing or phoning with the students in elementary school (A) and secondary school (B).

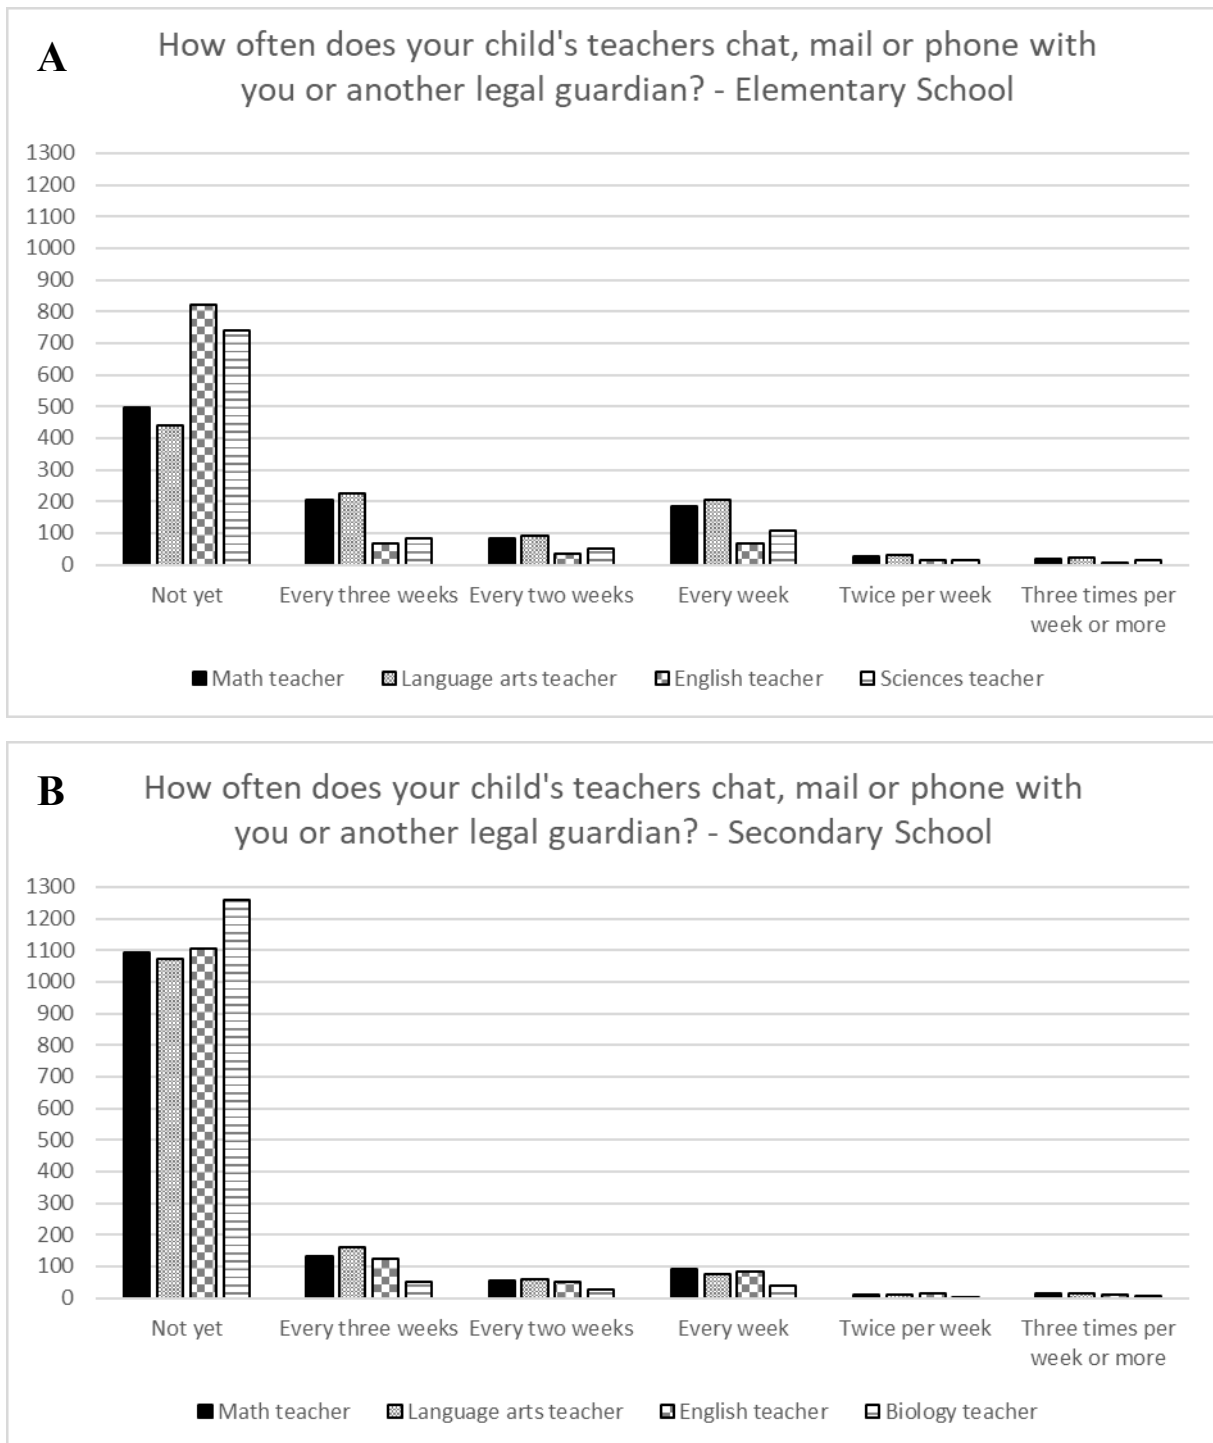

**Figure S5.7.** Frequencies of chatting, mailing or phoning with the parents or another legal guardian in elementary school (A) and secondary school (B).

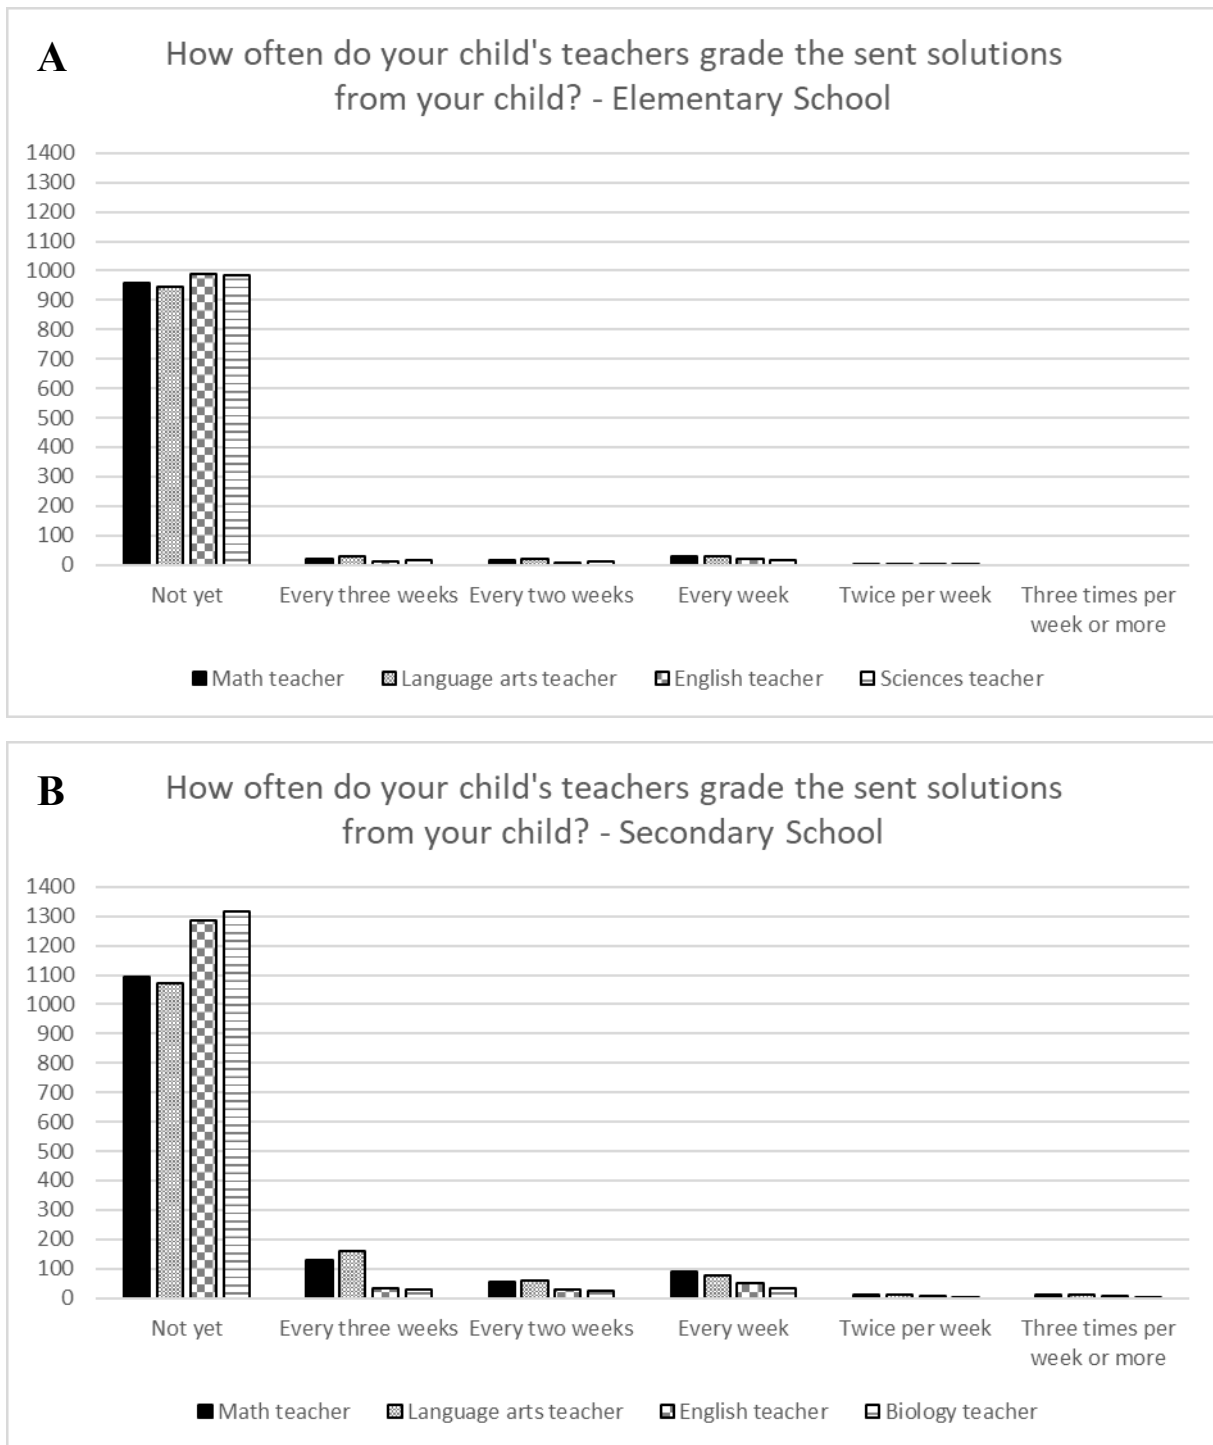

**Figure S5.8.** Frequencies of grading the task solutions in elementary school (A) and secondary school (B).

## Supplement 6. Descriptive statistics for the elementary school sample

**Table S6**

*Means (M), standard deviation (SD), internal consistencies ( $\alpha$ ) as well as bivariate correlations (above the diagonal parametric, below non-parametric) in the elementary school sample*

|                                                    | <i>M</i>          | <i>SD</i> | $\alpha$ | 1)   | 2)   | 3)   | 4)    | 5)   | 6)   | 7)  | 8)   | 9)   | 10)  | 11) | 12)   | 13)  | 14)  | 15)   | 16)   | 17)  | 18)   | 19)   | 20)   | 21)  | 22)  | 23)  |  |
|----------------------------------------------------|-------------------|-----------|----------|------|------|------|-------|------|------|-----|------|------|------|-----|-------|------|------|-------|-------|------|-------|-------|-------|------|------|------|--|
| Student outcomes during the school lockdown        |                   |           |          |      |      |      |       |      |      |     |      |      |      |     |       |      |      |       |       |      |       |       |       |      |      |      |  |
| 1) Motivation <sup>b</sup>                         | 2.68              | 1.13      | .91      |      | .51  | .54  | .12   | .13  | .09  | .11 | .06  | .09  | .18  | .15 | -.31  | .42  | .19  | .16   | .02   | .03  | -.04  | -.06  | <-.01 | .03  | .04  | .03  |  |
| 2) Competent and independent learning <sup>b</sup> | 3.08              | 1.05      | .85      | .50  |      | .34  | .10   | .10  | <.01 | .06 | <.01 | .04  | .13  | .08 | -.27  | .36  | .41  | .29   | .14   | -.02 | -.07  | -.08  | .04   | .04  | -.06 | .02  |  |
| 3) Learning Progress <sup>b</sup>                  | 2.96              | 1.16      |          | .52  | .33  |      | .12   | .10  | .07  | .10 | .03  | .08  | .12  | .20 | -.12  | .22  | .17  | .16   | .09   | <.01 | -.04  | .10   | -.10  | -.03 | -.07 | -.10 |  |
| Frequency of distant teaching activities           |                   |           |          |      |      |      |       |      |      |     |      |      |      |     |       |      |      |       |       |      |       |       |       |      |      |      |  |
| 4) Tasks <sup>c</sup>                              | 2.99 <sup>a</sup> | 0.87      | .74      | .10  | .11  | .11  |       | .50  | .39  | .39 | .10  | .25  | .36  | .32 | -.01  | .08  | .08  | .06   | <-.01 | -.03 | -.01  | -.12  | -.03  | .07  | -.04 | .14  |  |
| 5) Task Solutions <sup>c</sup>                     | 2.01 <sup>a</sup> | 1.21      | .88      | .10  | .09  | .07  | .43   |      | .28  | .40 | .13  | .24  | .34  | .31 | <-.01 | .06  | .06  | .01   | <-.01 | .02  | -.02  | -.08  | -.04  | .03  | -.06 | .17  |  |
| 6) Request Solutions <sup>c</sup>                  | 2.09 <sup>a</sup> | 1.20      | .89      | .08  | <.01 | .07  | .34   | .24  |      | .67 | .21  | .19  | .27  | .20 | -.02  | .04  | .04  | .04   | -.04  | .06  | .01   | -.05  | -.09  | .07  | -.03 | .11  |  |
| 7) Feedback <sup>c</sup>                           | 1.78 <sup>a</sup> | 1.08      | .88      | .10  | .05  | .10  | .32   | .35  | .67  |     | .22  | .24  | .37  | .31 | .03   | .04  | .06  | .09   | -.01  | .03  | <-.01 | -.09  | -.05  | .05  | -.03 | .11  |  |
| 8) Grading <sup>c</sup>                            | 1.12 <sup>a</sup> | 0.48      | .90      | .05  | <.01 | .02  | .05   | .11  | .18  | .22 |      | .05  | .06  | .05 | -.06  | .03  | <.01 | .03   | -.10  | .07  | .02   | <-.01 | -.08  | .02  | .03  | .04  |  |
| 9) Videoconference <sup>c</sup>                    | 1.21 <sup>a</sup> | 0.64      | .85      | .08  | .04  | .08  | .21   | .21  | .14  | .14 | .01  |      | .40  | .21 | <.01  | -.01 | -.01 | <-.01 | -.02  | -.01 | .02   | -.06  | -.07  | .02  | -.01 | .02  |  |
| 10) Communication Child <sup>c</sup>               | 1.63 <sup>a</sup> | 0.98      | .88      | .16  | .10  | .12  | .30   | .24  | .23  | .30 | .03  | .28  |      | .47 | -.03  | .06  | .06  | .03   | .02   | .04  | -.03  | -.18  | -.02  | .03  | -.02 | .07  |  |
| 11) Communication Parent <sup>c</sup>              | 1.85 <sup>a</sup> | 1.05      | .87      | .13  | .06  | .18  | .24   | .20  | .21  | .31 | .05  | .14  | .40  |     | .03   | .03  | .04  | .06   | .05   | .02  | -.02  | -.10  | <.01  | .01  | -.02 | -.03 |  |
| Student characteristics                            |                   |           |          |      |      |      |       |      |      |     |      |      |      |     |       |      |      |       |       |      |       |       |       |      |      |      |  |
| 12) Negative emotionality <sup>d</sup>             | 3.98              | 1.21      | .83      | -.32 | -.26 | -.11 | <-.01 | <.01 | -.01 | .04 | -.05 | -.01 | -.04 | .05 |       | -.29 | -.08 | -.07  | .02   | -.06 | <.01  | <-.01 | .05   | .01  | -.09 | -.04 |  |

|                                             |       |      |     |       |      |      |       |      |       |       |       |       |       |       |      |       |      |       |       |       |      |      |       |      |      |       |
|---------------------------------------------|-------|------|-----|-------|------|------|-------|------|-------|-------|-------|-------|-------|-------|------|-------|------|-------|-------|-------|------|------|-------|------|------|-------|
| 13) School Engagement <sup>d</sup>          | 4.07  | 1.18 | .79 | .41   | .35  | .20  | .10   | .04  | .03   | .02   | .03   | <.01  | .05   | .02   | -.28 | .43   | .41  | .08   | <-.01 | -.03  | -.09 | -.01 | .04   | .03  | .02  |       |
| 14) Math competencies <sup>d</sup>          | 4.76  | 1.51 | .97 | .18   | .40  | .16  | .08   | .06  | .03   | .05   | <-.01 | .03   | .05   | .02   | -.09 | .40   | .39  | .12   | .04   | -.04  | -.07 | -.02 | -.01  | -.22 | <.01 |       |
| 15) Language arts competencies <sup>d</sup> | 4.93  | 1.30 | .92 | .16   | .30  | .15  | .06   | .02  | .04   | .08   | .02   | .02   | .04   | .04   | -.07 | .41   | .37  | .14   | -.02  | .01   | -.06 | <.01 | .05   | .05  | -.03 |       |
| Social background                           |       |      |     |       |      |      |       |      |       |       |       |       |       |       |      |       |      |       |       |       |      |      |       |      |      |       |
| 16) Highest school leaving certificate      | 0.80  | 0.40 |     | .03   | .14  | .09  | <-.01 | <.01 | -.04  | -.01  | -.10  | <.01  | .02   | .06   | .02  | .07   | .11  | .14   |       | .02   | -.03 | -.09 | -.04  | .18  | .02  | -.05  |
| 17) Migration background                    | 0.07  | 0.26 |     | .02   | -.01 | <.01 | -.05  | .02  | .07   | .05   | .06   | -.04  | .01   | <-.01 | -.06 | <-.01 | .04  | -.01  | .02   |       | <.01 | .03  | <-.01 | .02  | <.01 | <-.02 |
| 18) Child has an own room                   | 0.87  | 0.33 |     | .04   | .07  | .04  | -.01  | .02  | <-.01 | <-.01 | -.05  | <-.01 | .03   | <-.01 | -.02 | .03   | .04  | <-.01 | .03   | <-.01 |      | -.07 | .02   | .14  | .02  | .06   |
| 19) Child has a computer/tablet             | 0.88  | 0.32 |     | .07   | .08  | .05  | .12   | .07  | .05   | .10   | <.01  | .03   | .14   | .09   | .01  | .09   | .08  | .06   | .09   | -.03  | -.07 |      | -.03  | .09  | -.05 | .10   |
| Child's and parent's gender and age         |       |      |     |       |      |      |       |      |       |       |       |       |       |       |      |       |      |       |       |       |      |      |       |      |      |       |
| 20) Parent's gender                         | 1.85  | 0.35 |     | <-.01 | .04  | .09  | -.01  | -.04 | -.07  | -.02  | -.07  | -.07  | <.01  | .01   | .05  | -.02  | -.02 | <-.01 | -.04  | <-.01 | -.02 | .03  |       | -.20 | .07  | -.03  |
| 21) Parent's age                            | 40.85 | 5.13 |     | .04   | .04  | -.01 | .07   | .03  | .07   | .03   | -.02  | .03   | .05   | <.01  | <.01 | .02   | -.01 | .06   | .18   | .01   | -.15 | -.09 | -.16  |      | .03  | .20   |
| 22) Child's gender                          | 1.47  | 0.50 |     | .04   | -.06 | -.07 | -.03  | -.06 | -.01  | -.03  | .04   | .02   | <-.01 | -.04  | -.09 | .04   | -.23 | .05   | .02   | <.01  | -.02 | .05  | .07   | .04  |      | -.04  |
| 23) Child's age                             | 8.31  | 1.26 |     | .03   | .03  | -.10 | .15   | .20  | .10   | .08   | .05   | .03   | .06   | -.06  | -.04 | .02   | .02  | -.01  | -.04  | -.02  | -.07 | -.10 | -.04  | .19  |      | -.03  |

Notes.  $N = 960 - 1,063$ . Highest school leaving certificate: 0 = no or vocational track school leaving certificate, 1 = academic track school leaving certificate; Child has an own room: 0 = no, 1 = yes; Child has a computer/tablet: 0 = no, 1 = yes; Gender: 0 = male, 1 = female; migration background: 0 = no, 1 = yes.

<sup>a</sup>The median was reported instead of the mean as the scores were skewed. <sup>b</sup>Scale ranged from 1 to 5. <sup>c</sup>Scale ranged from 1 to 6. <sup>d</sup>Scale ranged from 1 to 7. Correlations:  $r < .04$ ,  $p < .05$ .

## Supplement 7. Descriptive statistics for the secondary school sample

**Table S7**

*Means (M), standard deviation (SD), internal consistencies ( $\alpha$ ) as well as bivariate correlations (above the diagonal parametric, below non-parametric) in the secondary school sample*

|                                                    | <i>M</i>          | <i>SD</i> | $\alpha$ | 1)  | 2)   | 3)  | 4)  | 5)  | 6)  | 7)  | 8)  | 9)  | 10) | 11)  | 12)   | 13)  | 14)  | 15)  | 16)  | 17)  | 18)  | 19)   | 20)  | 21)  | 22)  | 23)  |  |
|----------------------------------------------------|-------------------|-----------|----------|-----|------|-----|-----|-----|-----|-----|-----|-----|-----|------|-------|------|------|------|------|------|------|-------|------|------|------|------|--|
| Student outcomes during the school lockdown        |                   |           |          |     |      |     |     |     |     |     |     |     |     |      |       |      |      |      |      |      |      |       |      |      |      |      |  |
| 1) Motivation <sup>b</sup>                         | 2.73              | 1.08      | .88      |     | .52  | .63 | .13 | .15 | .16 | .25 | .09 | .09 | .23 | .06  | -.30  | .40  | .13  | .19  | .04  | .05  | <.01 | -.09  | <.01 | .04  | .17  | .12  |  |
| 2) Competent and independent learning <sup>b</sup> | 3.24              | 1.02      | .86      | .50 |      | .28 | .04 | .07 | .09 | .15 | .05 | .10 | .14 | -.03 | -.31  | .36  | .21  | .31  | .09  | .02  | -.07 | -.09  | .03  | .08  | .14  | .31  |  |
| 3) Learning Progress <sup>b</sup>                  | 2.72              | 1.13      |          | .61 | .27  |     | .15 | .16 | .18 | .25 | .07 | .12 | .24 | .13  | -.13  | .28  | .10  | .14  | .02  | .06  | .01  | -.03  | .05  | -.02 | .08  | .01  |  |
| Frequency of distant teaching activities           |                   |           |          |     |      |     |     |     |     |     |     |     |     |      |       |      |      |      |      |      |      |       |      |      |      |      |  |
| 4) Tasks <sup>c</sup>                              | 3.79 <sup>a</sup> | 0.73      | .74      | .13 | .04  | .15 |     | .53 | .50 | .40 | .13 | .24 | .25 | .09  | .01   | .09  | .06  | .07  | -.03 | .01  | -.01 | -.02  | -.03 | -.03 | .04  | -.07 |  |
| 5) Task solutions <sup>c</sup>                     | 2.99 <sup>a</sup> | 1.13      | .79      | .16 | .05  | .16 | .52 |     | .35 | .48 | .14 | .33 | .30 | .14  | .01   | .07  | .07  | .05  | -.05 | -.07 | -.02 | <-.01 | -.05 | <.01 | .05  | -.10 |  |
| 6) Request solutions <sup>c</sup>                  | 3.09 <sup>a</sup> | 1.18      | .84      | .16 | .09  | .18 | .50 | .36 |     | .58 | .17 | .21 | .34 | .09  | -.01  | .04  | -.03 | .05  | <.01 | .02  | -.03 | .04   | -.06 | .07  | .01  | .11  |  |
| 7) Feedback <sup>c</sup>                           | 2.31 <sup>a</sup> | 1.18      | .82      | .24 | .15  | .24 | .37 | .46 | .56 |     | .26 | .33 | .49 | .22  | -.06  | .10  | .01  | .06  | -.05 | -.03 | -.01 | -.04  | -.02 | .04  | .05  | .05  |  |
| 8) Grading <sup>c</sup>                            | 1.18 <sup>a</sup> | 0.62      | .93      | .08 | .03  | .04 | .07 | .08 | .10 | .21 |     | .14 | .19 | .16  | -.03  | .05  | -.01 | -.02 | -.07 | .03  | .04  | -.02  | -.01 | <.01 | .04  | .11  |  |
| 9) Videoconference <sup>c</sup>                    | 1.62 <sup>a</sup> | 0.95      | .78      | .09 | .12  | .10 | .16 | .28 | .18 | .30 | .08 |     | .42 | .19  | .01   | .02  | .05  | .03  | .01  | -.05 | .01  | -.03  | -.05 | .04  | .01  | -.01 |  |
| 10) Communication child <sup>c</sup>               | 2.15 <sup>a</sup> | 1.26      | .85      | .22 | .12  | .23 | .21 | .25 | .32 | .47 | .12 | .35 |     | .26  | <-.01 | .08  | -.01 | .08  | -.03 | -.03 | -.03 | -.08  | -.04 | .02  | .05  | .07  |  |
| 11) Communication parent <sup>c</sup>              | 1.38 <sup>a</sup> | 0.77      | .85      | .03 | -.06 | .11 | .05 | .10 | .04 | .16 | .06 | .14 | .23 |      | .05   | -.02 | -.01 | -.04 | -.08 | -.01 | .06  | -.01  | .02  | -.06 | -.01 | -.13 |  |
| Student characteristics                            |                   |           |          |     |      |     |     |     |     |     |     |     |     |      |       |      |      |      |      |      |      |       |      |      |      |      |  |



|                                             |       |      |     |       |      |       |       |       |      |      |      |      |       |      |      |       |      |      |      |      |      |      |      |       |      |       |  |
|---------------------------------------------|-------|------|-----|-------|------|-------|-------|-------|------|------|------|------|-------|------|------|-------|------|------|------|------|------|------|------|-------|------|-------|--|
| 12) Negative emotionality <sup>d</sup>      | 3.66  | 1.27 | .84 | -.29  | -.31 | -.12  | -.02  | .01   | -.02 | -.05 | -.05 | .01  | <-.01 | .08  |      | -.24  | -.08 | -.11 | -.01 | -.05 | -.01 | .02  | .01  | -.07  | -.20 | -.17  |  |
| 13) School engagement <sup>d</sup>          | 4.10  | 1.25 | .83 | .40   | .36  | .27   | .08   | .06   | .05  | .11  | .03  | .02  | .09   | -.03 | -.24 |       | .36  | .48  | .09  | .00  | <.01 | -.04 | .05  | .03   | .26  | .07   |  |
| 14) Math competencies <sup>d</sup>          | 4.51  | 1.49 | .98 | .13   | .21  | .08   | .05   | .07   | -.03 | .03  | <.01 | .06  | <-.01 | .01  | -.08 | .35   |      | .28  | .11  | -.06 | -.04 | .02  | -.05 | .02   | -.16 | -.05  |  |
| 15) Language arts competencies <sup>d</sup> | 4.78  | 1.34 | .93 | .19   | .33  | .15   | .04   | .04   | .05  | .07  | -.02 | .06  | .11   | -.04 | -.14 | .47   | .27  |      | .16  | .01  | .00  | -.05 | -.01 | .05   | .15  | .05   |  |
| Social background                           |       |      |     |       |      |       |       |       |      |      |      |      |       |      |      |       |      |      |      |      |      |      |      |       |      |       |  |
| 16) Highest school leaving certificate      | 0.77  | 0.42 |     | .05   | .10  | .03   | -.02  | -.04  | <.01 | -.04 | -.06 | .08  | .00   | -.07 | -.01 | .10   | .11  | .16  |      | -.01 | -.05 | -.05 | -.11 | .17   | <.01 | -.04  |  |
| 17) Migration background                    | 0.07  | 0.25 |     | .04   | .02  | .05   | .01   | -.06  | .01  | -.04 | .01  | -.05 | -.02  | -.02 | -.05 | <-.01 | -.06 | .02  | -.01 |      | .12  | -.04 | .03  | -.09  | .01  | .03   |  |
| 18) Child has an own room                   | 0.94  | 0.24 |     | <-.01 | .07  | <-.01 | <.01  | .02   | .03  | .01  | -.03 | -.01 | .03   | -.04 | <.01 | .01   | .04  | .01  | .05  | -.12 |      | -.08 | -.02 | .14   | -.02 | .05   |  |
| 19) Child has a computer/tablet             | 0.96  | 0.19 |     | .09   | .09  | .04   | <-.01 | <-.01 | .04  | .04  | <.01 | .03  | .08   | .02  | -.01 | .05   | -.01 | .05  | .05  | .04  | -.08 |      | -.01 | .05   | .03  | .05   |  |
| Child's and parent's gender and age         |       |      |     |       |      |       |       |       |      |      |      |      |       |      |      |       |      |      |      |      |      |      |      |       |      |       |  |
| 20) Parent's gender                         | 1.83  | 0.37 |     | <-.01 | .03  | .05   | -.02  | -.05  | -.06 | -.01 | .02  | -.06 | -.03  | .01  | .02  | .05   | -.05 | -.01 | -.11 | .03  | .02  | .01  |      | -.23  | .09  | <-.01 |  |
| 21) Parent's age                            | 45.01 | 5.28 |     | .04   | .08  | -.03  | -.03  | <.01  | .07  | .06  | .01  | .08  | -.04  | -.08 | -.08 | .04   | .03  | .06  | .16  | -.08 | -.13 | -.05 | -.21 |       | -.02 | .27   |  |
| 22) Child's gender                          | 1.48  | 0.50 |     | .17   | .13  | .08   | .04   | .05   | .01  | .05  | .03  | .03  | .05   | -.01 | .20  | .26   | -.16 | .16  | <.01 | .01  | .02  | -.03 | .09  | <-.01 |      | -.03  |  |
| 23) Child's age                             | 12.55 | 1.86 |     | .11   | .31  | <-.01 | -.06  | -.09  | .13  | .07  | .14  | .02  | .09   | -.16 | -.16 | .04   | -.04 | .05  | -.05 | .04  | -.06 | -.06 | .01  | .26   | -.04 |       |  |

Notes.  $N = 1,273 - 1,456$ . Highest school leaving certificate: 0 = no or vocational track school leaving certificate, 1 = academic track school leaving certificate; Child has an own room: 0 = no, 1 = yes; Child has a computer/tablet: 0 = no, 1 = yes; Gender: 0 = male, 1 = female; migration background: 0 = no, 1 = yes.

<sup>a</sup>The median was reported instead of the mean as the scores were skewed. <sup>b</sup>Scale ranged from 1 to 5. <sup>c</sup>Scale ranged from 1 to 6. <sup>d</sup>Scale ranged from 1 to 7. Correlations:  $r < .04, p < .05$ .

**Supplement 8. Model fit of structure equation models without student characteristics and demographics as additional predictors**

**Table S8**

*Model Fit indices and inter-correlations between exogenous variables for structure equation models regressing distant teaching activities on students' academic outcomes during the school lockdown without student characteristics and demographics as additional predictors for the total sample (All), elementary school (ES) and secondary school (Sec)*

| Sample | $\chi^2$ (df) | RMSEA (CI 90%)     | CFI  | TLI  | $r_{resM \times resC}$ | $r_{resM \times resL}$ | $r_{resC \times resL}$ |
|--------|---------------|--------------------|------|------|------------------------|------------------------|------------------------|
| All    | 860.29 (541)  | .015 (.013 - .017) | .992 | .990 | .642                   | .625                   | .456                   |
| ES     | 618.00 (541)  | .012 (.006 - .016) | .997 | .996 | .568                   | .579                   | .388                   |
| Sec    | 681.35 (541)  | .013 (.010 - .016) | .992 | .990 | .639                   | .654                   | .347                   |

*Notes.* resM = residual factor motivation, resC = residual factor competent and independent learning, resL = residual learning process.

## Supplement 9. Results of structure equation models without student characteristics and demographics as additional predictors

**Table S9**

*Path weights of the structure equation model (SEM) regressing distant teaching activities regressed on students' motivation, competent and independent learning, and learning progress during the school lockdown*

|                       | Motivation |     |         |     |         |     | Competent and independent learning |     |         |     |         |     | Learning progress |     |         |     |         |     |
|-----------------------|------------|-----|---------|-----|---------|-----|------------------------------------|-----|---------|-----|---------|-----|-------------------|-----|---------|-----|---------|-----|
|                       | All        |     | ES      |     | Sec     |     | All                                |     | ES      |     | Sec     |     | All               |     | ES      |     | Sec     |     |
|                       | B          | SE  | $\beta$ | SE  | $\beta$ | SE  | $\beta$                            | SE  | $\beta$ | SE  | $\beta$ | SE  | $\beta$           | SE  | $\beta$ | SE  | $\beta$ | SE  |
| Tasks                 | .05        | .03 | -.01    | .05 | .20*    | .04 | .07*                               | .02 | .06     | .06 | .06     | .04 | .10*              | .04 | -.01    | .06 | .18*    | .08 |
| Task solutions        | .11*       | .03 | .12*    | .05 | < .01   | .04 | .04                                | .03 | .12*    | .03 | -.04    | .05 | .04               | .02 | .11     | .06 | .03     | .08 |
| Request solutions     | .03        | .03 | -.01    | .05 | -.11*   | .04 | -.04                               | .02 | -.05    | .04 | -.09*   | .02 | .03               | .04 | .00     | .07 | -.03    | .08 |
| Feedback              | .09*       | .04 | .21*    | .06 | .29*    | .03 | .09*                               | .03 | .16*    | .05 | .22*    | .03 | .10*              | .04 | .20*    | .06 | .24*    | .06 |
| Grading               | .01        | .03 | -.04    | .08 | -.09*   | .03 | -.04                               | .04 | -.13*   | .06 | -.05    | .05 | -.05*             | .02 | -.12    | .07 | -.19*   | .05 |
| Video                 | -.04       | .03 | -.04    | .05 | -.07    | .07 | .02                                | .03 | -.06    | .07 | .07     | .04 | -.02              | .03 | .05     | .06 | -.05    | .05 |
| Com. child            | .20*       | .03 | .18*    | .04 | .19*    | .08 | .16*                               | .03 | .16*    | .04 | .11*    | .03 | .14*              | .03 | .01     | .05 | .17*    | .07 |
| Com. parent           | -.02       | .01 | .06     | .06 | .01     | .03 | -.11*                              | .03 | -.03    | .07 | -.13*   | .03 | .14*              | .02 | .19*    | .05 | .11*    | .04 |
| <i>R</i> <sup>2</sup> | .115       |     | .103    |     | .163    |     | .054                               |     | .056    |     | .067    |     | .121              |     | .089    |     | .169    |     |

*Notes.* All = total sample; ES = Elementary school; Sec = Secondary School; Tasks = Sending Tasks; Tasks Solutions = Sending Task Solutions; Request Solutions = Requesting students' solutions; Feedback = Providing feedback on students' solutions; Video = Teaching via videoconference; Com. Child = Student-teacher communication; Com. Parent = parent-teacher communication.

\* $p < .05$ .
